# Supplementary material for: Low-coverage whole-genome sequencing of cerebrospinal-fluid-derived cell-free DNA in brain tumor patients
Source: PubMed Central journal article supplement — STAR Protoc. 2022 Apr 12;3(2):101292. doi: 10.1016/j.xpro.2022.101292 (PMC9026582; doi:10.1016/j.xpro.2022.101292), 2022-04-12
Supplement: mmc1.pdf [file mmc1.pdf]

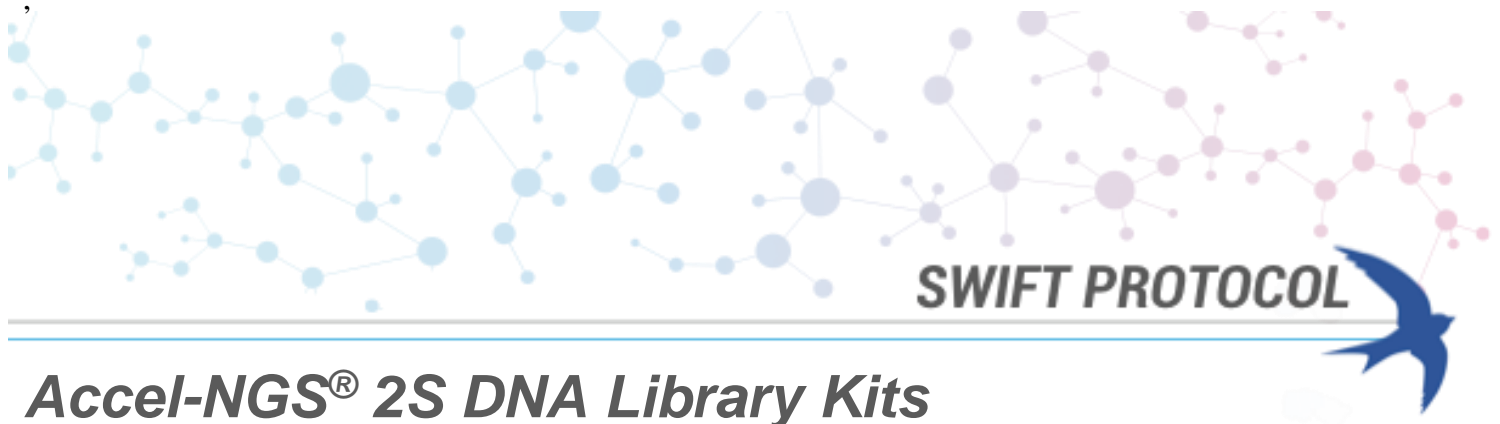

## **Accel-NGS<sup>®</sup> 2S DNA Library Kits**

### **Low Input Library Prep with Enhanced Repair for Fragmented dsDNA For Indexing by Ligation & Indexing by PCR**

#### **Protocol for Cat. Nos.:**

Accel-NGS<sup>®</sup> 2S PCR-Free DNA Library Kits (20024, 20096, 200384)

Accel-NGS<sup>®</sup> 2S Plus DNA Library Kits (21024, 21096, 21384)

Accel-NGS<sup>®</sup> 2S Hyb DNA Library Kits (23024, 23096, 23384)

#### **DNA Library Kits Compatible with:**

##### **Accel-NGS<sup>®</sup> 2S Indexed Adapters (Indexing by Ligation)**

2S Single Indexed Adapters (12-plex to 96-plex)

2S Single Indexed Adapters with MIDs (12-plex to 96-plex)

2S Combinatorial Dual Indexed Adapters (96-plex to 768-plex)

##### **Swift Indexing Primers (Indexing by PCR)**

Swift Single Indexing Primers (12-plex)

Swift Combinatorial Dual Indexing Primers (96-plex to 768-plex)

Swift Normalase Combinatorial Dual Indexing Primers (96-plex)

Swift Unique Dual Indexing Primers (96-plex)

Swift Normalase Unique Dual Indexing Primers (96-plex to 384-plex)

Note: All indexing primers require Accel-NGS<sup>®</sup> 2S Truncated Adapters for library preparation

##### **Swift Hybridization Capture Panels**

Swift Exome Hyb Panel (83216)

Swift Pan-Cancer Hyb Panel (83316)

Swift Inherited Diseases Hyb Panel (83416)

##### **Swift Normalase<sup>®</sup> Kits**

Swift Normalase<sup>®</sup> Kit (66096, 660384)

##### **Agilent SureSelect<sup>XT</sup>:**

2S SureSelect<sup>XT</sup> Compatibility Module (26424, 26496)

See Appendix Section E for details on Product Ordering Information.

Visit [swiftbiosci.com/protocols](http://swiftbiosci.com/protocols) for updates

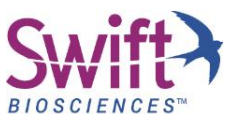

## Table of Contents

|                                                         |    |
|---------------------------------------------------------|----|
| <i>Product Information</i> .....                        | 2  |
| <i>Sample Types</i> .....                               | 2  |
| <i>Accel-NGS® 2S Workflows</i> .....                    | 3  |
| <i>Kit Contents</i> .....                               | 4  |
| <i>Storage and Usage Recommendations</i> .....          | 4  |
| <i>Materials and Equipment Not Included</i> .....       | 5  |
| <i>Tips and Techniques</i> .....                        | 5  |
| <i>Avoid Cross Contamination</i> .....                  | 5  |
| <i>Size Selection During Clean-Up Steps</i> .....       | 5  |
| <i>Prepare DNA Samples</i> .....                        | 6  |
| <i>Input DNA Quantification</i> .....                   | 6  |
| <i>DNA Shearing</i> .....                               | 6  |
| <i>Prepare Reaction Mixes and Ethanol</i> .....         | 6  |
| <i>Prepare DNA Libraries</i> .....                      | 7  |
| Repair I.....                                           | 7  |
| Repair II.....                                          | 8  |
| Ligation I.....                                         | 8  |
| Ligation II.....                                        | 9  |
| Library Amplification.....                              | 11 |
| <i>Appendix</i> .....                                   | 14 |
| Section A: Input DNA Quantification.....                | 14 |
| Section B: Size Selection/Clean-Up Protocol.....        | 14 |
| Section C: Normalase PCR Instructions .....             | 15 |
| Section D: Indexed Adapter Sequences .....              | 17 |
| Section E: Product Ordering Information .....           | 19 |
| Section F: Helpful Information and Troubleshooting..... | 20 |
| <i>Revision History</i> .....                           | 21 |
| <i>General Warranty</i> .....                           | 21 |
| <i>Limitation of Liability</i> .....                    | 21 |
| <i>Notice to Purchaser: Limited License</i> .....       | 21 |

## Support

For additional support please contact Swift at [TechSupport@swiftbio.com](mailto:TechSupport@swiftbio.com), or by phone: 734.330.2568 (9:00 am – 5:00 pm ET, Monday through Friday).

## Product Information

This guide provides instructions for the preparation of high complexity NGS libraries from fragmented double-stranded DNA (dsDNA) using Accel-NGS 2S DNA Library Kits. These kits offer a unique solution to improve NGS library preparation from low input and damaged samples for sequencing on Illumina® Platforms, supporting a broad range of input quantities from 1 µg down to 10 pg. Numerous indexing options are available for the two Accel-NGS 2S workflows (indexing by ligation and indexing by PCR), see below and Appendix Section D for details.

### Indexing by Ligation:

- PCR-free libraries can be prepared using full-length indexed adapters and a minimum of 100 ng to 1 µg input DNA.
- Optional library amplification can be performed using the primers and High-Fidelity Polymerase provided in the 2S Plus Kit.
- Full-length indexed adapters are compatible with the MID workflow where indexed i7 adapters are used with an i5 adapter comprising a 9N molecular identifier sequence (for more information, see the Swift Tech Note on the 2S product page: [Increase Specificity of Detecting Low Frequency Alleles with Molecular Identifiers](#)).

### Indexing by PCR:

- When indexing by PCR, library amplification is required for completing library preparation as truncated, non-indexed adapters are attached during the ligation steps (truncated adapters TruY2 and TruB2 required for this workflow. Refer to Appendix Section E for Product Order Information.
- For direct sequencing applications, Swift High-Fidelity Polymerase is supplied in the 2S Plus Kit for library amplification.

### Hybridization Capture:

- Whether indexing by ligation or by PCR, use the Polymerase recommended by the hybridization capture panel vendor for pre- and post-hyb PCR steps.
- 2S is compatible with:
  - Swift Hybridization Capture Panels
  - IDT xGen® Lockdown Panels
  - Twist Bioscience Panels
  - Arbor Biosciences Panels
  - Agilent SureSelect<sup>XT</sup> Panels (for compatibility, use the XT Module for ligation steps)

### Normalase

- Swift Normalase is compatible with Accel-NGS 2S Plus where Normalase primers are required during library amplification to increase yield and condition libraries for Normalase chemistry, see Appendix Section C.
  - When indexing by ligation, a Normalase kit is required which includes Normalase PCR primers.
  - When indexing by PCR, a Normalase kit and Normalase Indexing primers are required to complete the workflow. Available indexing includes CDI (96-plex) and UDI (96-plex to 384-plex).
- Swift Normalase is not compatible with Accel-NGS 2S PCR-Free as PCR is required. For Accel-NGS 2S Hyb, Normalase is compatible with post-hyb PCR but not for pre-hyb PCR.

### Automation

This protocol is readily automatable. A 10% overage volume of reagents is supplied in the 24, 96, and 384 reaction kits to accommodate automation. Swift Biosciences does not supply automated liquid handling instruments or consumables but collaborates with automation solution providers and customers to develop optimized scripts for use of our kits with liquid handling platforms routinely used in NGS library preparation. Please contact your instrument vendor or [Automation@swiftbio.com](mailto:Automation@swiftbio.com) if you plan to use this kit with your automated liquid handling system.

## Sample Types

The Accel-NGS 2S DNA Library Kits are suitable for the following sample types and support a broad range of input quantities from 1 µg down to 10 pg.

- Damaged DNA samples including FFPE
- Low cell number ChIP and Hi-C samples
- Low input Cell-free DNA (Liquid biopsy)
- Low input metagenome samples

Damaged samples are supported due to the unique end repair capabilities where both damaged 5' and 3' termini can be excised and replaced to improve ligation efficiency.

Low inputs are supported by performing sequential ligation that overcomes the requirement for adapter titration, thereby maintaining efficient ligation at low nanogram and picogram input quantities.

## Accel-NGS® 2S Workflows

### Indexing by Ligation

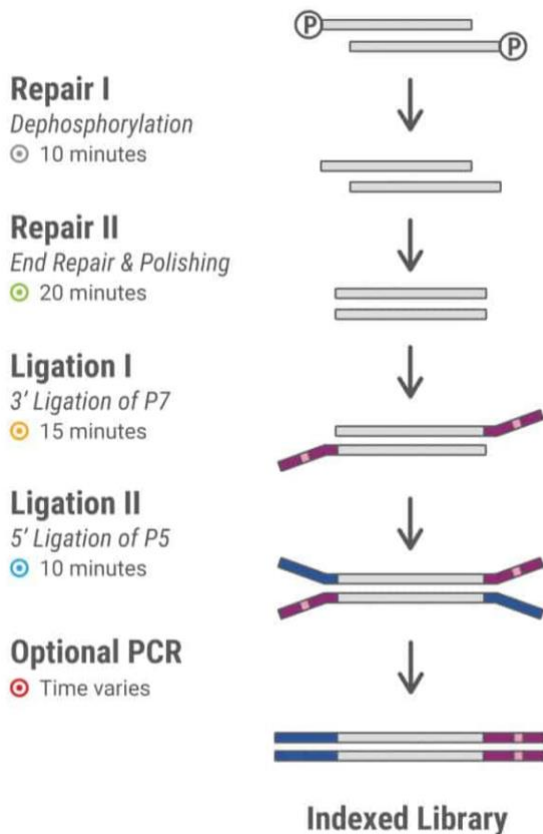

### Indexing by PCR

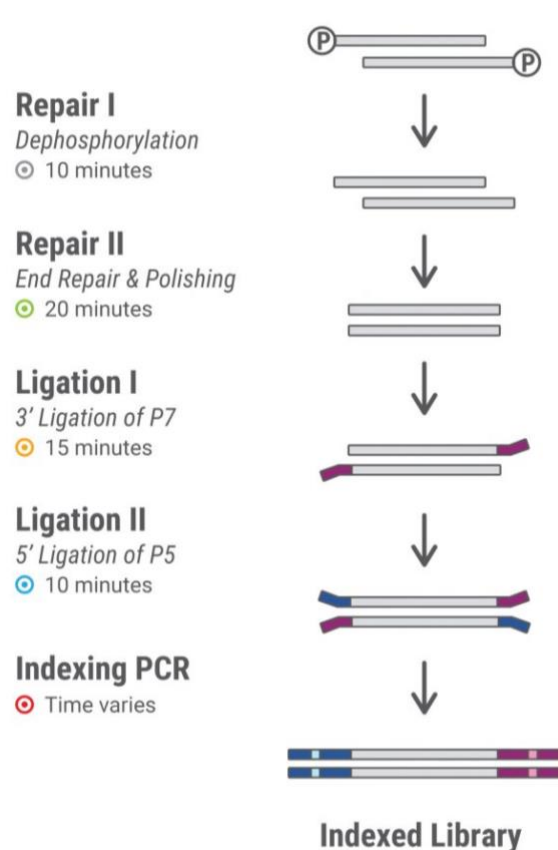

**Repair I:** 5' and 3' ends are dephosphorylated to prevent chimera formation and improve adapter ligation to 3' ends.

**Repair II:** additional 3' end repair and polishing of 3' and 5' overhangs is performed.

**Ligation I:** the full-length i7 or truncated adapter is ligated to the 3' ends of the dsDNA substrate.

**Ligation II:** 5' end repair and ligation of the full-length i5 adapter or truncated adapter to 5' ends of the dsDNA substrate.

PCR increases library yield and incorporates indexes if using truncated adapters.

Bead-based purifications are used to remove unused adapters and change buffer composition between steps.

**NOTE:** Normalase primers can be used during PCR for compatibility with the Normalase workflow (see Appendix Section C and the Normalase protocol for instructions).

## Kit Contents

- The Accel-NGS 2S Kits contain sufficient reagents for the preparation of 24 or 96 libraries (10% excess volume provided). The 384 reaction kits are a bundle of 4x96 reactions.
- Indexed adapters or indexing primers are sold separately (see Appendix Section D) for indexing information. **IMPORTANT:** If using indexing primers, the truncated adapters (TruY2, TruB2) Cat. No. 28196 are required for adapter ligation steps. The truncated adapters can be purchased separately or together with the indexing primers. See Appendix Section E for Product Ordering Information.

| Protocol stage        | Component                                 | Volume (μl) |         | Storage   |
|-----------------------|-------------------------------------------|-------------|---------|-----------|
|                       |                                           | 24 rxns     | 96 rxns |           |
| Repair I              | ● Buffer W1                               | 158         | 634     | -20°C**   |
|                       | ● Enzyme W2                               | 28          | 106     |           |
| Repair II             | ● Buffer G1                               | 132         | 528     |           |
|                       | ● Reagent G2                              | 344         | 1374    |           |
|                       | ● Enzyme G3                               | 28          | 106     |           |
|                       | ● Enzyme G4                               | 28          | 106     |           |
| Ligation I            | ● Buffer Y1                               | 80          | 316     |           |
|                       | ● Indexed i7 Adapter Y2 or Reagent TruY2* | -           | -       |           |
|                       | ● Enzyme Y3                               | 53          | 212     |           |
| Ligation II           | ● Buffer B1                               | 132         | 528     |           |
|                       | ● Indexed i5 Adapter B2 or Reagent TruB2* | -           | -       |           |
|                       | ● Reagent B3                              | 238         | 950     |           |
|                       | ● Enzyme B4                               | 28          | 106     |           |
|                       | ● Enzyme B5                               | 53          | 212     |           |
|                       | ● Enzyme B6                               | 28          | 106     |           |
| Library Amplification | ● Reagent R1 Primers or Indexing Primers* | -           | -       |           |
|                       | ● Reagent R2                              | 106         | 424     |           |
|                       | ● Buffer R3                               | 264         | 1056    |           |
|                       | ● Enzyme R4                               | 53          | 212     |           |
| Additional Reagents   | Low EDTA TE                               | 20 mL       | 20 mL   | Room Temp |
|                       | PEG NaCl Solution                         | 20 mL       | 20 mL   |           |

\* Adapters and primers are sold separately, see Appendix Section E for Product Ordering Information.

If the SureSelect<sup>XT</sup> Module is used, use Reagent Y-XT, B2, and R-XT for Ligation I, Ligation II and Library Amplification step.

\*\* Temperature range -15° C to -25° C.

## Storage and Usage Recommendations

- Upon receipt, store the Accel-NGS 2S DNA Library Kit products at -20°C with the exception of PEG and TE solutions, which are stored at room temperature.
- To maximize use of enzyme reagents when ready to use, remove enzyme tubes from -20°C storage and place on ice for 10 minutes prior to pipetting. Attempting to pipette enzymes at -20°C may result in shortage of enzyme reagents.
- After thawing reagents on ice, briefly vortex (except enzymes) to mix well, then pulse spin to collect contents before proceeding.

## Materials and Equipment Not Included

- Compatible Indexed Adapters if indexing by ligation (see Appendix Sections D and E)
- Compatible Indexing Primers if indexing by PCR (see above and Appendix Sections D and E).  
Note: if indexing by PCR, truncated adapters (TruY2, TruB2) Cat. No. 28196 are also required. These are sold in combination with indexing primers or separately.
- Swift Normalase Kit (Cat. No. 66096, 660384), if using the Normalase workflow.  
Note: Normalase Indexing Primers are available, if using the Normalase workflow and indexing by PCR (see Appendix Section C)
- SPRIselect beads (Beckman Coulter, Cat. Nos. B23317/B23318/B23319) or Agencourt AMPure XP beads (Beckman Coulter, Cat. Nos. A63880/A63881/A63882)
- Permagen Magnetic Separator (Cat. No. MSR812), Agencourt SPRIPlate or similar magnetic rack for magnetic bead clean-ups
- Qubit® or other fluorometric-based assay for determining dsDNA concentration
- If assessing damaged human DNA samples, the [Input DNA Quantification Assay](#) can be used to determine DNA quantity and integrity (Input DNA Quantification Primers Cat. No. 90396 are sold separately).
- Method for fragmentation of input DNA (validated with Covaris® shearing)
- Agilent Bioanalyzer or other electrophoretic instrument to determine fragment and library size
- qPCR-, electrophoretic-, or fluorometric-based library quantification assay for Illumina libraries
- Microcentrifuge
- Vortex
- Programmable thermocycler
- 0.2 mL PCR tubes or 96-well plate
- Aerosol-resistant tips and pipettes ranging from 1-1000 µl
- 200-proof/absolute ethanol and nuclease-free water (both molecular biology grade) for preparation of fresh 80% ethanol

## Tips and Techniques

### ***Avoid Cross Contamination***

To reduce the risk of DNA and library contamination, physically separate the laboratory space, equipment, and supplies where pre-PCR and post-PCR processes are performed. Follow the instructions below to avoid cross-contamination:

- Clean lab areas using 0.5% sodium hypochlorite (10% bleach).
- Use barrier pipette tips to avoid exposure to potential contaminants.
- Always change tips between each sample.

### ***Size Selection During Clean-Up Steps***

This protocol has been validated with SPRIselect® beads (Beckman Coulter) but can be used with Agencourt AMPure® XP (Beckman Coulter). See Appendix Section B for instructions. If other beads are used, solutions and conditions for DNA binding may differ. Consider the information below for performing efficient size selection:

- Post shearing, confirm the size distribution of each sample by electrophoretic methods to determine the median fragment size of your dsDNA samples.
- The size selection steps in this protocol perform a Left Side Size Selection and are designed to remove unused oligonucleotides and small DNA fragments to select the specified insert size.

- To customize size selection, please use Beckman Coulter's SPRIselect User Guide for desired conditions not included in this protocol.

## Prepare DNA Samples

### *Input DNA Quantification*

- Determine the dsDNA concentration using Qubit, or a similar fluorometric method, as it will accurately represent the double-stranded, adaptable DNA content of your sample.
- If working with damaged human samples, the [Input DNA Quantification Assay](#) can be used to determine DNA quantity and integrity (Input DNA Quantification Primers Cat. No. 90396 are sold separately), See Appendix, Section A for details.
- This kit has been validated for use with a wide range of DNA inputs; 10 pg to 1 µg.

### *DNA Shearing*

This step is required for intact DNA samples but not samples such as ChIP or cell-free DNA. This protocol was validated with Covaris shearing and supports 200, 350 and 450 bp sheared DNA in low EDTA TE (10 mM Tris, 0.1 mM EDTA). If the DNA volume is less than 40 µl, add Swift Low EDTA TE to a final volume of 40 µl. Other shear sizes are compatible, please contact Swift at [TechSupport@swiftbio.com](mailto:TechSupport@swiftbio.com).

### *Prepare Reaction Mixes and Ethanol*

This is a "with bead" protocol, meaning beads containing the crowding agent, 20% polyethylene glycol (PEG), 2.5 M NaCl, added to clean up the Repair I reaction will be retained and re-used throughout subsequent enzymatic reactions, and clean-ups where additional PEG NaCl is added to the re-cycled beads to cause the negatively-charged DNA to bind with the carboxyl groups on the bead surface. As the immobilization is dependent on the concentration of PEG and salt in the reaction, the volumetric ratio of beads to DNA is critical. After each cleanup step, the beads are resuspended in the next reaction mix.

**IMPORTANT!** Prepare the reaction mixes in advance to ensure that each mix is added without delay to prevent drying of the beads following each cleanup step.

- Assemble all Reaction Mixes (see instructions on pages 7-10) for Repair I, Repair II, Ligation I and Ligation II steps **ON ICE** and scale volumes as appropriate, using 5% excess volume to compensate for pipetting loss. For convenience, please use our [Accel-NGS 2S Master Mix Volume Calculator](#) (located on our Accel-NGS® 2S product webpage protocols and tools tab).
- After thawing reagents, briefly vortex (except enzymes) to mix well, and pulse spin to collect contents prior to opening.
- Always add reagents in the specified order, thoroughly mix each Reaction Mix, pulse spin to collect contents and store **ON ICE** prior to using.
- Prepare fresh 80% ethanol solution using 200-proof/absolute ethanol and nuclease-free water. Approximately 2 mL of 80% ethanol will be used per sample.

# Prepare DNA Libraries

## Repair I

- Transfer the fragmented DNA samples to a sterile 0.2 mL PCR tube and adjust the volume of the sample to 40  $\mu$ l using Low EDTA TE, if necessary.
- Add 20  $\mu$ l of the pre-mixed Repair I Reaction Mix (listed in the table below) to each PCR tube containing the 40  $\mu$ l DNA sample.

| Reagents                     | Volume per Sample           |
|------------------------------|-----------------------------|
| Low EDTA TE                  | 13 $\mu$ l                  |
| • Buffer W1                  | 6 $\mu$ l                   |
| • Enzyme W2                  | 1 $\mu$ l                   |
| <b>Repair I Reaction Mix</b> | <b>20 <math>\mu</math>l</b> |
| Sample                       | 40 $\mu$ l                  |
| <b>Total Volume</b>          | <b>60 <math>\mu</math>l</b> |

- Mix by gently pipetting. Place in the thermocycler and run the Repair I Thermocycler Program below. For cfDNA inputs, please follow the Repair Thermocycler Program specific to cfDNA.

| Sample Type      | Thermocycler Program           |
|------------------|--------------------------------|
| cfDNA            | 37 °C, 5 min, lid heating ON   |
|                  | 65 °C, 2 min, lid heating ON   |
|                  | 37 °C, 5 min, lid heating ON   |
| All Other Inputs | 37 °C, 10 min, lid heating OFF |

- Clean up the Repair I reaction using SPRISelect beads, a magnetic rack, and freshly prepared 80% ethanol. See Appendix, Section B for instructions. Follow the clean-up instructions below:

### For Direct Sequencing:

| dsDNA Input          | Insert Size | Sample Volume | Bead Volume             | PEG NaCl Volume |
|----------------------|-------------|---------------|-------------------------|-----------------|
| cfDNA                | All Sizes   | 60 $\mu$ l    | 84 $\mu$ l (ratio: 1.4) | -               |
| Less than 10 ng gDNA | All Sizes   | 60 $\mu$ l    | 84 $\mu$ l (ratio: 1.4) | -               |
| >10 ng – 250 ng gDNA | 200 bp      | 60 $\mu$ l    | 60 $\mu$ l (ratio: 1.0) | -               |
|                      | 350 bp      | 60 $\mu$ l    | 54 $\mu$ l (ratio: 0.9) | -               |
|                      | 450 bp      | 60 $\mu$ l    | 42 $\mu$ l (ratio: 0.7) | -               |

### For Hyb Capture:

| dsDNA Input | Insert Size | Sample Volume | Bead Volume              | PEG NaCl Volume |
|-------------|-------------|---------------|--------------------------|-----------------|
| All Inputs  | All Sizes   | 60 $\mu$ l    | 108 $\mu$ l (ratio: 1.8) | -               |

- Carefully remove and discard the supernatant without removing any beads.



## Repair II

- Add 50  $\mu\text{l}$  of the pre-mixed Repair II Reaction Mix (listed in the table below) to the beads for each sample and mix by pipetting until homogeneous.

| Reagents                      | Volume per Sample                  |
|-------------------------------|------------------------------------|
| Low EDTA TE                   | 30 $\mu\text{l}$                   |
| • Buffer G1                   | 5 $\mu\text{l}$                    |
| • Reagent G2                  | 13 $\mu\text{l}$                   |
| • Enzyme G3                   | 1 $\mu\text{l}$                    |
| • Enzyme G4                   | 1 $\mu\text{l}$                    |
| <b>Repair II Reaction Mix</b> | <b>50 <math>\mu\text{l}</math></b> |
| Sample                        | Beads                              |
| <b>Total Volume</b>           | <b>50 <math>\mu\text{l}</math></b> |

- Place the samples in the thermocycler, programmed at 20 °C for 20 minutes with lid heating OFF.
- Clean up the Repair II reaction using PEG NaCl solution, a magnetic rack, and freshly prepared 80% ethanol. See Appendix, Section B for instructions. Follow the clean-up instructions below:

### For Direct Sequencing:

| dsDNA Input          | Insert Size | Sample Volume    | Bead Volume | PEG NaCl Volume                  |
|----------------------|-------------|------------------|-------------|----------------------------------|
| cfDNA                | All Sizes   | 50 $\mu\text{l}$ | -           | 60.0 $\mu\text{l}$ (ratio: 1.2)  |
| >10 ng – 250 ng gDNA | All Sizes   | 50 $\mu\text{l}$ | -           | 60.0 $\mu\text{l}$ (ratio: 1.2)  |
|                      | 200 bp      | 50 $\mu\text{l}$ | -           | 42.5 $\mu\text{l}$ (ratio: 0.85) |
|                      | 350 bp      | 50 $\mu\text{l}$ | -           | 37.5 $\mu\text{l}$ (ratio: 0.75) |
|                      | 450 bp      | 50 $\mu\text{l}$ | -           | 27.5 $\mu\text{l}$ (ratio: 0.55) |

### For Hyb Capture:

| dsDNA Input | Insert Size | Sample Volume    | Bead Volume | PEG NaCl Volume                  |
|-------------|-------------|------------------|-------------|----------------------------------|
| All Inputs  | All Sizes   | 50 $\mu\text{l}$ | -           | 82.5 $\mu\text{l}$ (ratio: 1.65) |

- Carefully remove and discard the supernatant without removing any beads.

## Ligation I

- Refer to the tables below for preparing the Ligation I Reaction Mix when using either an indexed i7 adapter (left table, Reagent Y2) or truncated adapter (right table, Reagent TruY2).
- Add 25  $\mu\text{l}$  (for indexing by ligation, left) or 30  $\mu\text{l}$  (for indexing by PCR, right) pre-mixed Ligation I Reaction Mix to the beads for each sample and re-suspend by pipetting, then add the individual indexed i7 adapter to each sample *ONLY* if indexing by ligation (left).

| Indexing by Ligation |                                      |
|----------------------|--------------------------------------|
| Reagents             | Volume per Sample                    |
| Low EDTA TE          | 20 µl                                |
| • Buffer Y1          | 3 µl                                 |
| • Enzyme Y3          | 2 µl                                 |
| <b>Reaction Mix</b>  | <b>25 µl</b>                         |
| Sample               | Beads                                |
| • Reagent Y2*        | 5 µl (uniquely added to each sample) |
| <b>Total Volume</b>  | <b>30 µl</b>                         |

| Indexing by PCR     |                   |
|---------------------|-------------------|
| Reagents            | Volume per Sample |
| Low EDTA TE         | 20 µl             |
| • Buffer Y1         | 3 µl              |
| • Enzyme Y3         | 2 µl              |
| • Reagent TruY2**   | 5 µl              |
| <b>Reaction Mix</b> | <b>30 µl</b>      |
| Sample              | Beads             |
| <b>Total Volume</b> | <b>30 µl</b>      |

\* **For indexing by ligation**, Reagent Y2 is the indexed i7 adapter and should be added individually to each sample.

\*\* **For indexing by PCR**, Reagent TruY2 is the truncated adapter and should be added directly to the reaction mix. For Agilent SureSelect<sup>XT</sup>, use 5 µl Y-XT adapter supplied in the XT Module.

- The final reaction volume for each sample is 30 µl (listed in the table below). Place samples in the thermocycler and run the Ligation I Thermocycler Program at 25 °C for 15 minutes with lid heating OFF.
- Clean up the Ligation I reaction using a magnetic rack and freshly prepared 80% ethanol. See Appendix, Section B for instructions. Follow the clean-up instructions below.

#### For Direct Sequencing:

| dsDNA Input          | Insert Size | Sample Volume | Bead Volume | PEG NaCl Volume       |
|----------------------|-------------|---------------|-------------|-----------------------|
| cfDNA                | 165 bp      | 30 µl         | -           | 31.5 µl (ratio: 1.05) |
| Less than 10 ng gDNA | All Sizes   | 30 µl         | -           | 25.5 µl (ratio: 0.85) |
| >10 ng – 250 ng gDNA | All Sizes   | 30 µl         | -           | 36.0 µl (ratio: 1.2)  |

#### For Hyb Capture:

| dsDNA Input | Insert Size | Sample Volume | Bead Volume | PEG NaCl Volume       |
|-------------|-------------|---------------|-------------|-----------------------|
| All Inputs  | All Sizes   | 30 µl         | -           | 49.5 µl (ratio: 1.65) |

- Carefully remove and discard the supernatant without removing any beads.

## Ligation II

Add 48 µl (for indexing by ligation) or 50 µl (for indexing by PCR) of pre-mixed Ligation II Reaction Mix (listed in the table below) to the beads for each sample and re-suspend by pipetting, then add the individual indexed i5 adapter to each sample *ONLY* if indexing by ligation (left).

| Indexing by Ligation |                   |
|----------------------|-------------------|
| Reagents             | Volume per Sample |
| Low EDTA TE          | 30 µl             |
| • Buffer B1          | 5 µl              |
| • Reagent B3         | 9 µl              |
| • Enzyme B4          | 1 µl              |
| • Enzyme B5          | 2 µl              |
| • Enzyme B6          | 1 µl              |
| <b>Reaction Mix</b>  | <b>48 µl</b>      |
| Sample               | Beads             |
| • Reagent B2*        | 2 µl              |
| <b>Total Volume</b>  | <b>50 µl</b>      |

| Indexing by PCR     |                   |
|---------------------|-------------------|
| Reagents            | Volume per Sample |
| Low EDTA TE         | 30 µl             |
| • Buffer B1         | 5 µl              |
| • Reagent TruB2**   | 2 µl              |
| • Reagent B3        | 9 µl              |
| • Enzyme B4         | 1 µl              |
| • Enzyme B5         | 2 µl              |
| • Enzyme B6         | 1 µl              |
| <b>Reaction Mix</b> | <b>50 µl</b>      |
| Sample              | Beads             |
| <b>Total Volume</b> | <b>50 µl</b>      |

\* **For indexing by ligation**, Reagent B2 is the indexed i5 adapter and should be added individually to each sample.

\*\* **For indexing by PCR**, Reagent TruB2 is the truncated adapter and should be added directly to the reaction mix. For Agilent SureSelect<sup>XT</sup>, use 2 µl Reagent B2 adapter supplied in the XT Module.

- Place the samples in the thermocycler, programmed at 40 °C for 10 minutes with lid heating OFF (25 °C HOLD). Alternatively, the thermocycler lid may be left open.
- Clean up the Ligation II Reaction using a magnetic rack, PEG NaCl solution, and freshly prepared 80% ethanol. See Appendix, Section B for instructions. Follow the size selection instructions below.

#### For Direct Sequencing:

| dsDNA Input          | Insert Size | Sample Volume | Bead Volume | PEG NaCl Volume       | Elution Volume |
|----------------------|-------------|---------------|-------------|-----------------------|----------------|
| cfDNA                | 165 bp      | 50 µl         | -           | 52.5 µl (ratio: 1.05) | 20 µl          |
| Less than 10 ng gDNA | All Sizes   | 50 µl         | -           | 45.5 µl (ratio: 0.85) | 20 µl          |
| >10 ng – 250 ng gDNA | All Sizes   | 50 µl         | -           | 60.0 µl (ratio: 1.2)  | 20 µl          |

#### For Hyb Capture:

| dsDNA Input | Insert Size | Sample Volume | Bead Volume | PEG NaCl Volume       | Elution Volume |
|-------------|-------------|---------------|-------------|-----------------------|----------------|
| All Inputs  | All Sizes   | 50 µl         | -           | 82.5 µl (ratio: 1.65) | 20 µl          |

- At the end of the clean-up step, resuspend the beads in 20 µl of Low EDTA TE buffer.
- Place the sample tubes on a magnetic rack and wait 2 minutes.
- Carefully transfer the supernatant containing the final library to a clean tube without carrying any beads.

### ---- SAFE STOPPING POINT ----

Store freshly prepared libraries at 4 °C (or long term at -20 °C).

## Library Amplification

Library amplification is optional if using at least 100 ng input and full length, indexed adapters. Indexing PCR is required if using truncated adapters in order to complete the adapter sequences and index each library.

**Use step 19-A if using full length, indexed Y2 and B2 adapters and Reagent R1 or the XT Module.**

**Use step 19-B if using truncated TruY2 and TruB2 adapters and Indexing Primers.**

**19-A** For optional library amplification of fully indexed libraries, add 30  $\mu$ l of the PCR Reaction Mix (listed in the table below) to the entire eluted library (20  $\mu$ l). Be sure to include Reagent R1 (library amplification primers) in the reaction mix. Mix by moderate vortexing for 5 seconds and spin down in a centrifuge.

**NOTE:** If using Normalase Primers (Reagent R5), see Appendix Section C and the Normalase Kit Protocol for specific instructions.

| Indexing by Ligation    |                             |
|-------------------------|-----------------------------|
| Reagents                | Volume per Sample           |
| Low EDTA TE             | 10 $\mu$ l                  |
| • Reagent R1*           | 5 $\mu$ l                   |
| • Reagent R2            | 4 $\mu$ l                   |
| • Buffer R3             | 10 $\mu$ l                  |
| • Enzyme R4             | 1 $\mu$ l                   |
| <b>PCR Reaction Mix</b> | <b>30 <math>\mu</math>l</b> |
| Eluted Sample           | 20 $\mu$ l                  |
| <b>Total Volume</b>     | <b>50 <math>\mu</math>l</b> |

\* For SureSelect<sup>XT</sup> use 5  $\mu$ l R-XT primer pair from the XT Module.

**19-B** For Indexing PCR, add 25  $\mu$ l PCR Reaction Mix to each sample and then add a unique combination of indexing primers directly to each sample following the table below as a guideline. Mix by moderate vortexing for 5 seconds and spin down in a centrifuge.

**IMPORTANT:** If using the Normalase workflow see Appendix Section C and the Normalase Kit Protocol for specific instructions for Normalase PCR.

| Indexing Options                      | Reagents              | Volume per Sample |
|---------------------------------------|-----------------------|-------------------|
| Single Indexing                       | Pre-mixed primer pair | 5 $\mu$ l         |
| Unique Dual Indexing (UDI)            | Pre-mixed primer pair | 5 $\mu$ l         |
| Combinatorial Dual Indexing (CDI)     | i5 primer             | 2.5 $\mu$ l       |
|                                       | i7 primer             | 2.5 $\mu$ l       |
| Normalase Unique Dual Indexing* (UDI) | Pre-mixed primer pair | 4 $\mu$ l         |
|                                       | Reagent R7            | 1 $\mu$ l         |

\* The Normalase workflow is not required when using these indexing primers, add Reagent R7 to the PCR Reaction Mix, see Appendix Section C.

| Indexing by PCR         |                   |
|-------------------------|-------------------|
| Reagents                | Volume per Sample |
| Low EDTA TE             | 10 µl             |
| • Reagent R2            | 4 µl              |
| • Buffer R3             | 10 µl             |
| • Enzyme R4             | 1 µl              |
| <b>PCR Reaction Mix</b> | <b>25 µl</b>      |
| Sample                  | 20 µl             |
| Indexing Primers        | 5 µl              |
| <b>Total Volume</b>     | <b>50 µl</b>      |

20. Place the sample tubes in the thermocycler and run the Indexing PCR Thermocycler Program below.

| Input       | Recommended PCR Cycles for Direct Sequencing* | Thermocycler Program         |
|-------------|-----------------------------------------------|------------------------------|
| 100 ng      | 3                                             | 98 °C for 30 seconds         |
| 10 ng       | 6                                             | <b>PCR Cycles:</b>           |
| 1 ng        | 9                                             | 98 °C for 10 seconds         |
| 100 pg      | 12                                            | 60 °C for 30 seconds         |
| 10 pg       | 15                                            | 68 °C for 60 seconds         |
| 10 ng cfDNA | 0 - 2                                         | Hold at 4 °C – Proceed       |
| 1 ng cfDNA  | 5 - 6                                         | immediately to clean-up step |

**IMPORTANT:** The number of cycles required to produce library for sequencing will depend on input quantity and quality. In the case of low-quality samples including FFPE, the number of cycles required may vary based on the quality of the sample and amount of usable DNA present. Approximate guidelines for high-quality DNA are as indicated above, but the exact number of cycles required must be determined by the user.

\*Please refer to vendor specific thermocycling instructions to achieve the desired library yield for pre-hybridization capture pooling, being sure to also use the recommended polymerase.

21. Clean up the PCR Reaction using magnetic beads and freshly prepared 80% ethanol. See Appendix, Section B for instructions. Follow the size selection instructions below.

### 21-A For Direct Sequencing:

| dsDNA Input          | Insert Size | Sample Volume | Bead Volume           | PEG NaCl Volume | Elution Volume |
|----------------------|-------------|---------------|-----------------------|-----------------|----------------|
| cfDNA                | All Sizes   | 50 µl         | 42.5 µl (ratio: 0.85) | -               | 20 µl          |
| Less than 10 ng gDNA | All Sizes   | 50 µl         | 42.5 µl (ratio: 0.85) | -               | 20 µl          |
| >10 ng – 250 ng gDNA | All Sizes   | 50 µl         | 70.0 µl (ratio: 1.4)  | -               | 20 µl          |

**IMPORTANT:** If sequencing on patterned flow cells, the **optional second bead purification** below will reduce indexing primer carryover and lower index hopping artefacts. This purification is not required if sequencing on non-patterned flow cells, performing Hyb Capture or if using UDIs.

### Optional Second Bead Purification:

At the end of the first clean-up, re-suspend the beads in 50 µl of Low EDTA TE buffer and incubate for 1-2 minutes. DO NOT transfer elute to a new tube but proceed directly to second clean-up by addition of PEG NaCl to the bead elute.

| dsDNA Input          | Insert Size | Sample Volume | Bead Volume | PEG NaCl Volume       | Elution Volume |
|----------------------|-------------|---------------|-------------|-----------------------|----------------|
| cfDNA                | All Sizes   | 50 µl         | -           | 52.5 µl (ratio: 1.05) | 20 µl          |
| Less than 10 ng gDNA | All Sizes   | 50 µl         | -           | 42.5 µl (ratio: 0.85) | 20 µl          |
| 10 ng – 250 ng gDNA  | All Sizes   | 50 µl         | -           | 60.0 µl (ratio: 1.2)  | 20 µl          |

### 21-B For Hyb Capture:

| dsDNA Input | Insert Size | Sample Volume | Bead Volume        | PEG NaCl Volume | Elution Volume             |
|-------------|-------------|---------------|--------------------|-----------------|----------------------------|
| All Inputs  | All Sizes   | 50 µl         | 90 µl (ratio: 1.8) | -               | 20 µl of H <sub>2</sub> O* |

\* It is important elute in water to prevent residual EDTA from interfering with downstream applications.

22. At the end of the clean-up, resuspend the beads in 20 µl of Low EDTA TE buffer for direct sequencing or 20 µl H<sub>2</sub>O for Hyb Capture.
23. Place the sample tubes on a magnetic rack and wait 2 minutes.
24. Carefully transfer the supernatant containing the final library to a clean tube without carrying any beads.

### ---- SAFE STOPPING POINT ----

Store freshly prepared libraries at 4 °C (or long term at -20 °C).

## Quantification

PCR-free libraries must be quantified by qPCR as fluorometric methods such as Qubit® are unable to distinguish fully from partially adapted dsDNA. PCR-free libraries also migrate abnormally on electrophoretic chips such as Bioanalyzer due to the partially single stranded adapters so this method is not recommended.

PCR amplified library yields can be assessed by fluorometric, electrophoretic or qPCR-based methods.

# Appendix

## Section A: Input DNA Quantification

Fluorometric-based (Qubit) quantification will provide accurate DNA concentrations for samples with high quality DNA but is not recommended for cfDNA and FFPE samples. If working with cfDNA or FFPE samples, we recommend quantification by qPCR using supplied Alu primers for both short and long amplicons to accurately determine the usable concentration and quality of the sample DNA.

Alu sequences are highly abundant in the human genome and can be used for the sensitive quantification of human genomic DNA. Included in this kit are qPCR primers that can be used to amplify two differently sized amplicons: short (115 bp; Alu115) and long (247 bp; Alu247) amplicons from genomic Alu repeats. Following input analysis, the appropriate amount of sample DNA can be used as input for NGS library preparation.

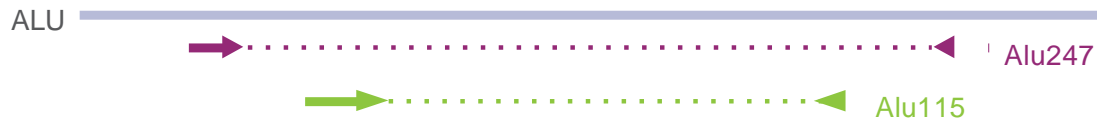

To quantify low-quality dsDNA samples using Input DNA Quantification Primers Cat. No. 90396. Please refer to the Protocol: [Input DNA Quantification Assay](#) for instructions.

## Section B: Size Selection/Clean-Up Protocol

Please use the following protocol for each clean-up step, substituting the correct **Bead Volume** and **Elution Volume** based on the table provided for each section.

1. Prepare a fresh 80% ethanol solution using 200-proof/absolute ethanol and nuclease-free water. Approximately 2 mL of 80% ethanol solution will be used per sample.
2. Ensure the magnetic beads are at room temperature and vortex beads to homogenize the suspension before use.
3. Add the specified Bead Volume to each sample. Mix by vortexing. Quick spin the samples in a microcentrifuge.
4. Incubate the samples for 5 minutes at room temperature.
5. Place the samples on a magnetic rack until the solution clears and a pellet is formed (~ 2 minutes).
6. Remove and discard the supernatant without disturbing the pellet (less than 5  $\mu$ l may be left behind).
7. Add 180  $\mu$ l of freshly prepared 80% ethanol solution to the sample while it is still on the magnetic rack. Use care not to disturb the pellet. Incubate for 30 seconds and then carefully remove the ethanol solution.
8. Repeat step 6 once more for a second wash with the 80% ethanol solution.
9. Quick spin the samples in a microcentrifuge and place back on the magnetic rack. Remove any residual ethanol solution from the bottom of the tube.
10. Remove the samples from the magnetic rack.
11. Add the specified elution volume of Low EDTA TE buffer and re-suspend the pellet. Mix well by pipetting up and down until homogenous.
12. Place the samples back on the magnetic rack until the solution clears and a pellet is formed (~ 2 minutes).
13. Transfer the specified eluate volume to a new 0.2 mL PCR tube. Ensure that eluate does not contain magnetic beads (indicated by brown coloration in eluate). If magnetic beads are present, place on magnet for 2 minutes and transfer eluate again to a new 0.2 mL PCR tube.

## Section C: Normalase PCR Instructions

Please review this section and the Normalase Kit protocol (<https://swiftbiosci.com/protocols/>) before setting up your Normalase PCR for Accel-NGS 2S Plus or post-hyb PCR. In order to achieve expected results, amplify each library using Normalase primers with the appropriate number of cycles and thermocycling conditions shown below to obtain a library yield of 12 nM or greater in a 20 µl eluate.

### Normalase PCR Setups:

#### For Indexing by Ligation, use Normalase Primers (Reagent R5)

1. If you typically obtain the required minimum threshold (i.e.  $\geq 12$  nM following library amplification), simply utilize Normalase primers (Reagent R5 included in the Normalase Kit) and add one additional PCR cycle to your program.
2. If prior to amplification your library yields are  $\geq 12$  nM, a minimum of 3 cycles is still required to condition the libraries for downstream Normalase enzymology.
3. Assemble your PCR Master Mix using standard PCR reagents as shown in the table below, except substitute standard primers (Reagent R1 included with indexed adapters) with 5 µl of Reagent R5. Thoroughly mix by moderate vortexing, pulse spin to collect contents and place in the thermocycler.

| Swift Hot Start High Fidelity Polymerase                         |                                                                                                                                 |
|------------------------------------------------------------------|---------------------------------------------------------------------------------------------------------------------------------|
| PCR RXN                                                          | Master Mix                                                                                                                      |
| Sample: 20 µl<br>Master Mix: 30 µl<br><b>Final Volume: 50 µl</b> | Low EDTA TE: 10 µl<br>Reagent R2: 4 µl<br>Buffer R3: 10 µl<br>Enzyme R4: 1 µl<br>Reagent R5: 5 µl<br><b>Final Volume: 30 µl</b> |

4. Run the following thermocycler program, adjusting the number of cycles depending on the input amount and sample quality. Lid heating set to 105 °C.

| Temperature       | Time   |
|-------------------|--------|
| 98 °C             | 30 sec |
| ▲ 98 °C           | 10 sec |
| 60 °C             | 30 sec |
| 68 °C             | 60 sec |
| Perform X cycles* |        |
| 68 °C             | 5 min  |
| 4 °C              | hold   |

\* The recommended minimum number of cycles for each input in order to provide  $\geq 12$  nM yields suitable for the Normalase workflow is as follows:



| DNA Input (ng) | Minimum number of cycles for $\geq 12$ nM |
|----------------|-------------------------------------------|
| $\geq 100$     | 4                                         |
| 10             | 8                                         |
| 1              | 11                                        |
| 0.1            | 14                                        |
| 0.01           | 17                                        |

- Proceed to SPRI clean-up step 21-24 on page 12-13 of this protocol.
- Proceed to Normalase I, Pooling, and Normalase II in the Normalase Kit Protocol.

### For Indexing by PCR, use Normalase Indexing Primers

Normalase indexing primers complete the adapter sequences, amplify and condition libraries for downstream Normalase steps. Assemble using standard PCR reagents as shown below, except substitute standard indexing primers with Normalase Indexing Primers and Reagent R6 or R7.

- To each sample library (20  $\mu$ l eluate), add 2  $\mu$ l of each Normalase Combinatorial Dual Indexing Primer or 4  $\mu$ l of Normalase Unique Dual Indexing Primers for a total volume of 24  $\mu$ l. See Appendix Section D for Index information.

| Indexing Options | Reagents              | Volume per Sample |
|------------------|-----------------------|-------------------|
| Normalase CDI    | i5 primer             | 2.0 $\mu$ l       |
|                  | i7 primer             | 2.0 $\mu$ l       |
| Normalase UDI    | Pre-mixed primer pair | 4.0 $\mu$ l       |

- Assemble the PCR master mix on ice. Mix thoroughly and pulse spin to collect contents. Add 26  $\mu$ l of the mix to each sample tube, mix thoroughly and pulse spin to collect contents (50  $\mu$ l final PCR volume) and place in the thermocycler.

| Swift Hot Start High Fidelity Polymerase                                                                |                                                                                                                                                                       |                                                                                                                                                                       |
|---------------------------------------------------------------------------------------------------------|-----------------------------------------------------------------------------------------------------------------------------------------------------------------------|-----------------------------------------------------------------------------------------------------------------------------------------------------------------------|
| PCR RXN                                                                                                 | CDI Master Mix per Sample                                                                                                                                             | UDI Master Mix per Sample                                                                                                                                             |
| Sample + Primers: 24 $\mu$ l<br>Master Mix: 26 $\mu$ l<br><b>Final PCR Volume: 50 <math>\mu</math>l</b> | Low EDTA TE: 10 $\mu$ l<br>Reagent R2: 4 $\mu$ l<br>Buffer R3: 10 $\mu$ l<br>Enzyme R4: 1 $\mu$ l<br>Reagent R6: 1 $\mu$ l<br><b>Master Mix: 26 <math>\mu</math>l</b> | Low EDTA TE: 10 $\mu$ l<br>Reagent R2: 4 $\mu$ l<br>Buffer R3: 10 $\mu$ l<br>Enzyme R4: 1 $\mu$ l<br>Reagent R7: 1 $\mu$ l<br><b>Master Mix: 26 <math>\mu</math>l</b> |

- Repeat steps 4 - 6 of the above protocol for indexing by ligation.

## Section D: Indexed Adapter Sequences

Below is a summary of indexing options for Accel-NGS 2S:

| Indexing Kit                                                  | Reagent                                   | Reagent Contents            | Volume per Sample |
|---------------------------------------------------------------|-------------------------------------------|-----------------------------|-------------------|
| Single Indexed Adapters<br>(12 to 96-plex)                    | Set A+B (I1-I27)<br>Set S1-S4 (S701-S796) | Indexed i7 Adapter          | 5 µl              |
|                                                               | Reagent B2                                | Universal P5 Adapter        | 2 µl              |
| Single Indexed Adapters + MID<br>(12 to 96-plex)              | Set A+B (I1-I27)<br>Set S1-S4 (S701-S796) | Indexed i7 Adapter          | 5 µl              |
|                                                               | Reagent B2-MID                            | MID i5 Adapter              | 2 µl              |
| Combinatorial Dual<br>Indexed Adapters<br>(192 to 768-plex)   | Set S1-S4 (S701-S796)                     | i7 Adapter                  | 5 µl              |
|                                                               | D501-D508                                 | i5 Adapter                  | 2 µl              |
|                                                               |                                           |                             |                   |
| Combinatorial Dual<br>Indexing Primers<br>(96-plex)           | D501-D508                                 | i5 primer                   | 2.5 µl            |
|                                                               | D701-D712                                 | i7 primer                   | 2.5 µl            |
| Normalase Combinatorial Dual<br>Indexing Primers (96-plex)    | D501N-D508N                               | i5 primer                   | 2 µl              |
|                                                               | D701N-D712N                               | i7 primer                   | 2 µl              |
| Unique Dual Indexing Primers<br>(24 to 96-plex)               | U001-U096                                 | Pre-mixed i5 and i7 primers | 5 µl              |
| Normalase Unique Dual<br>Indexing Primers<br>(96 to 384-plex) | SU001-SU384                               | Pre-mixed i5 and i7 primers | 4 µl              |

**To access the index sequences, please see the [Swift Index Sequences Master List on the Protocols page at https://swiftbiosci.com/protocols/](https://swiftbiosci.com/protocols/).**

The full-length adapter sequences of the single, combinatorial dual, and unique dual indexes are below. The underlined text indicates the location of the index sequences. All Swift adapter sequences are Illumina TruSeq based (TS).

### **Swift Single Indexed Adapter Sequences (Set A+B, Set S1-S4, Universal and MID)**

TS Universal Adapter:

5' AATGATACGGCGACCACCGAGATCTACACTCTTTCCCTACACGACGCTCTTCCGATCT

TS Index (i5) Adapter (MID):

5' AATGATACGGCGACCACCGAGATCTACACNNNNNNNNNACACTCTTTCCCTACACGACGCTCTTCCGATCT

TS Index (i7) Adapter (I1-I12):

5' GATCGGAAGAGCACACGTCTGAACTCCAGTCACXXXXXX(AT)CTCGTATGCCGTCTTCTGCTTG

TS Index (i7) Adapter (I13-I27):

5' GATCGGAAGAGCACACGTCTGAACTCCAGTCACXXXXXX(XX)ATCTCGTATGCCGTCTTCTGCTTG

TS Index (i7) Adapter (S701-S796):

5' GATCGGAAGAGCACACGTCTGAACTCCAGTCACXXXXXXXXXATCTCGTATGCCGTCTTCTGCTTG

The number on the product tube label indicates which index is provided in the tube. For Set A+B, the bases in parentheses are not considered part of the 6-base index sequences but can be used for 8-base index reads. For Set S1-S4, the index sequences are 8-base and the MID is a 9-base index read.

Each tube i5 adapters contains 22 µl and each i7 adapters contains 22 µl of the appropriate indexed adapters.

### ***Swift Combinatorial Dual Indexed Adapter Sequences***

TS Index (i7) Adapter (D701-D712 for 96-plex; S701-S796 for 192 to 768-plex):

5' GATCGGAAGAGCACACGTCTGAACTCCAGTCACXXXXXXXXXATCTCGTATGCCGTCTTCTGCTTG

TS Index (i5) Adapter (D501-D508):

5' AATGATACGGCGACCACCGAGATCTACACXXXXXXXXXACACTCTTCCCTACACGACGCTCTTCCGATCT

For 96-plex Combinatorial Dual Indexing Primers, each D50X tube contains 33 µl and each D7XX tube contains 22 µl.

For 96-plex Normalase Combinatorial Dual Indexing Primers, each D50XN tube contains 27 µl and each D7XXN tube contains 18 µl. The Reagent R6 tube contains 106 µl.

For 192-plex Combinatorial Dual Indexed Adapters, each D50X tube contains 53 µl and each S7XX tube contains 44 µl.

For 768-plex Combinatorial Dual Indexed Adapters, each D50X tube contains 53 µl and each S7XX tube contains 44 µl.

### ***Swift Unique Dual Indexed Adapter Sequences***

The UDI 96-plex Set are 8-base index sequences, whereas the UDI 96 to 384-plex set is 10-base index sequences as depicted by the two additional (XX) bases.

TS Index (i7) Adapters:

5' – GATCGGAAGAGCACACGTCTGAACTCCAGTCACXXXXXXXXX(XX)ATCTCGTATGCCGTCTTCTGCTTG – 3'

TS Index (i5) Adapters:

5' – AATGATACGGCGACCACCGAGATCTACACXXXXXXXXX(XX)ACACTCTTCCCTACACGACGCTCTTCCGATCT  
– 3'

Each U0XX tube contains 22 µl of the appropriate indexing primer set. Each U0XX/SUXXX plate well contains 12 µl.

## Section E: Product Ordering Information

| Workflow Component                                                                 | Product Name                                                                                         | Catalog Number     |
|------------------------------------------------------------------------------------|------------------------------------------------------------------------------------------------------|--------------------|
| Library Prep Kits                                                                  | Accel-NGS® 2S PCR-Free Library Kit (24, 96 or 4x96 rxns Bundle)                                      | 20024/20096/200384 |
|                                                                                    | Accel-NGS® 2S Plus DNA Library Kit (24, 96 or 4x96 rxns Bundle)                                      | 21024/21096/210384 |
|                                                                                    | Accel-NGS® 2S Hyb DNA Library Kit (24, 96 or 4x96 rxns Bundle)                                       | 23024/23096/230384 |
| 2S Hyb SureSelect <sup>XT</sup>                                                    | 2S SureSelect <sup>XT</sup> MID Compatibility Module (24 or 96 rxns)                                 | 27424/27496        |
|                                                                                    | 2S SureSelect <sup>XT</sup> Compatibility Module (24 or 96 rxns)                                     | 26424/26496        |
| Normalase Kits                                                                     | Swift Normalase® Kit (96 or 4x96 rxns Bundle)                                                        | 66096/660384       |
| Single Indexed Adapters (with and without MIDs)                                    | 2S Set A Single Indexed Adapters (12-plex, 48 rxns)                                                  | 26148              |
|                                                                                    | 2S Set B Single Indexed Adapters (12-plex, 48 rxns)                                                  | 26248              |
|                                                                                    | 2S Set A+B Single Indexed Adapters (24-plex, 96 rxns)                                                | 26396              |
|                                                                                    | 2S Set A MID Indexed Adapters (12-plex, 48 rxns)                                                     | 27148              |
|                                                                                    | 2S Set B MID Indexed Adapters (12-plex, 48 rxns)                                                     | 27248              |
|                                                                                    | 2S Set A+B MID Indexed Adapters (24-plex, 96 rxns)                                                   | 27396              |
|                                                                                    | 2S Set S1 Single Indexed Adapters (24-plex, 96 rxns)                                                 | 26596              |
|                                                                                    | 2S Set S2 Single Indexed Adapters (24-plex, 96 rxns)                                                 | 26696              |
|                                                                                    | 2S Set S3 Single Indexed Adapters (24-plex, 96 rxns)                                                 | 26796              |
|                                                                                    | 2S Set S4 Single Indexed Adapters (24-plex, 96 rxns)                                                 | 26896              |
|                                                                                    | 2S Set S1-S4 Single Indexed Adapters (96-plex, 384 rxns)                                             | 269384             |
|                                                                                    | 2S Set S1 MID Indexed Adapters (24-plex, 96 rxns)                                                    | 27596              |
|                                                                                    | 2S Set S2 MID Indexed Adapters (24-plex, 96 rxns)                                                    | 27696              |
|                                                                                    | 2S Set S3 MID Indexed Adapters (24-plex, 96 rxns)                                                    | 27796              |
|                                                                                    | 2S Set S4 MID Indexed Adapters (24-plex, 96 rxns)                                                    | 27896              |
|                                                                                    | 2S Set S1-S4 MID Indexed Adapters (96-plex, 384 rxns)                                                | 279384             |
| CDI Adapters                                                                       | 2S Set S1 Combinatorial Dual Indexed Adapters (192-plex, 192 rxns)                                   | 28596              |
|                                                                                    | 2S Set S2 Combinatorial Dual Indexed Adapters (192-plex, 192 rxns)                                   | 28696              |
|                                                                                    | 2S Set S3 Combinatorial Dual Indexed Adapters (192-plex, 192 rxns)                                   | 28796              |
|                                                                                    | 2S Set S4 Combinatorial Dual Indexed Adapters (192-plex, 192 rxns)                                   | 28896              |
|                                                                                    | 2S Set S1-S4 Combinatorial Dual Indexed Adapters (768-plex, 768 rxns)                                | 289384             |
| UDI Primers (with and without Truncated Adapters)                                  | Swift Unique Dual Indexing Primers (24-plex, 96 rxns + <b>Truncated Adapters</b> )                   | 29096              |
|                                                                                    | Swift Unique Dual Indexing Primers (96-plex, 384 rxns + <b>Truncated Adapters</b> )                  | 290384             |
|                                                                                    | Swift Unique Dual Indexing Primers (24-plex, 96 rxns)                                                | X9096              |
|                                                                                    | Swift Unique Dual Indexing Primers (96-plex, 384 rxns)                                               | X90384             |
|                                                                                    | Swift Unique Dual Indexing Primer Plate (96-plex, 96 rxns)                                           | X9096-PLATE        |
|                                                                                    | Swift Unique Dual Indexing Primer Plates (96-plex, 4x96 rxns Bundle)                                 | X90384-PLATE       |
|                                                                                    | Swift Normalase® Unique Dual Indexing Primer Plates (384-plex, 4x96 rxns Bundle)                     | X91384-PLATES      |
|                                                                                    | Swift Normalase® Unique Dual Indexing Primer Plate (96-plex, 96 rxns, SU001-SU096)                   | X91096-1-PLATE     |
|                                                                                    | Swift Normalase® Unique Dual Indexing Primer Plate (96-plex, 96 rxns, SU097-SU192)                   | X91096-2-PLATE     |
|                                                                                    | Swift Normalase® Unique Dual Indexing Primer Plate (96-plex, 96 rxns, SU193-SU288)                   | X91096-3-PLATE     |
| Swift Normalase® Unique Dual Indexing Primer Plate (96-plex, 96 rxns, SU289-SU384) | X91096-4-PLATE                                                                                       |                    |
| CDI Primers (with and without Truncated Adapters)                                  | Swift Combinatorial Dual Indexing Primers (96-plex, 96 rxns + <b>Truncated Adapters</b> )            | 28096              |
|                                                                                    | Swift Combinatorial Dual Indexing Primers (96-plex, 96 rxns)                                         | X8096              |
|                                                                                    | Swift Normalase® Combinatorial Dual Indexing Primers (96-plex, 96 rxns + <b>Truncated Adapters</b> ) | 69096              |
|                                                                                    | Swift Normalase® Combinatorial Dual Indexing Primers (96-plex, 96 rxns)                              | 68096              |
| Truncated Adapters ONLY                                                            | Accel-NGS® 2S Truncated Adapters (96 rxns)                                                           | 28196              |

## Section F: Helpful Information and Troubleshooting

| <i>Problem</i>                                                                 | <i>Possible Cause</i>                                                                                                                                                                        | <i>Suggested Remedy</i>                                                                                                                                                                                                                                                                                                          |
|--------------------------------------------------------------------------------|----------------------------------------------------------------------------------------------------------------------------------------------------------------------------------------------|----------------------------------------------------------------------------------------------------------------------------------------------------------------------------------------------------------------------------------------------------------------------------------------------------------------------------------|
| Library migrates unexpectedly on Bioanalyzer                                   | Over-amplification of library leads to the formation of heteroduplex structures that migrate abnormally.<br>PCR-Free libraries migrate abnormally due to partially single stranded adapters. | Quantify library by qPCR, as other quantification methods will not accurately detect heteroduplex library molecules.<br>Perform the minimum number of PCR cycles necessary to avoid over-amplification.                                                                                                                          |
| Incomplete resuspension of beads after ethanol wash during purification steps. | Over-drying of beads.                                                                                                                                                                        | Continue pipetting the liquid over the beads to break up clumps for complete resuspension. To avoid over-drying, re-suspend beads immediately after the removal of residual ethanol.<br>Make sure to prepare master mixes in advance so bead resuspension can be performed without delay, following removal of residual ethanol. |
| Shortage of enzyme reagents.                                                   | Pipetting enzymes at -20 °C.                                                                                                                                                                 | Place enzyme reagents on ice for 10 minutes prior to pipetting.                                                                                                                                                                                                                                                                  |
| Retention of liquid in pipette tip                                             | Viscous reagents (i.e., enzymes) may stick to pipette tip, especially for non-low retention tips.                                                                                            | Pipette up and down several times to ensure all liquid is released from the pipette tip.                                                                                                                                                                                                                                         |
| Unexpected increase in adapter dimers                                          | Improper bead purification<br><br>Lower than expected input DNA quantity                                                                                                                     | Use the specified bead volume particularly for the post-PCR purification<br>Carefully quantify input to ensure appropriate cleanup steps are performed                                                                                                                                                                           |

## Support

For additional support please contact Swift at [TechSupport@swiftbio.com](mailto:TechSupport@swiftbio.com), or by phone: 734.330.2568 (9:00 am – 5:00 pm ET, Monday through Friday).

## Revision History

| Document # | Revision  | Date      | Description of Change |
|------------|-----------|-----------|-----------------------|
| PRT-037    | Version 1 | 1/12/2021 | Initial release.      |

## General Warranty

Swift Biosciences, Inc. ("Swift") warrants that its products meet Swift's specifications at the time of delivery. Any sample or model used in connection with Swift's product literature is for illustrative purposes only and does not constitute a warranty that the products will conform to the sample or model. To the maximum extent permitted by applicable law, Swift hereby expressly disclaims, and the buyer hereby expressly waives, any warranty regarding results obtained through the use of the products including, without limitation, any claim of inaccurate, invalid, or incomplete results. All other warranties, representations, terms and conditions (statutory, express, implied or otherwise) as to quality, condition, description, merchantability, fitness for purpose, or non-infringement (except for the implied warranty of title) are hereby expressly excluded. All warranty claims on products must be made in writing within ninety (90) days of receipt of the products. Swift's sole liability and the buyer's exclusive remedy for a breach of this warranty is limited to replacement or refund at the sole option of Swift. The warranties identified in this paragraph are Swift's sole and exclusive warranties with respect to the products and are in lieu of all other warranties, statutory, express or implied, all of which other warranties are expressly disclaimed, including without limitation any implied warranty of merchantability, fitness for a particular purpose, non-infringement, or regarding results obtained through the use of any product (including, without limitation, any claim of inaccurate, invalid or incomplete results), whether arising from a statute or otherwise in law or from a course of performance, dealing or usage of trade.

## Limitation of Liability

Swift Biosciences, Inc. ("Swift") shall have no liability under the warranties cited above with respect to any defect in the products arising from: (i) specifications or materials supplied by the buyer; (ii) willful damage or negligence of the buyer or its employees or agents; (iii) abnormal working conditions at the buyer's premises; (iv) failure to follow Swift's use restrictions or instructions (whether oral or in writing); (v) misuse or alteration of the products without Swift's approval; or (vi) if the buyer is in breach of its payment obligations in regards to purchasing the products. To the fullest extent allowed by law, in no event shall Swift be liable, whether in contract, tort, strict liability, negligence, warranty, or under any statute or on any other basis for any special, incidental, indirect, exemplary, punitive, multiple or consequential damages sustained by the buyer or any other person or entity arising out of or caused by product, Swift's performance or failure to perform its obligations relating to the purchase of product or performance of services, Swift's breach of these terms, the possession or use of any product, or the performance by Swift of any services, whether or not foreseeable and whether or not Swift is advised of the possibility of such damages, including without limitation damages arising from or related to loss of use, loss of data, downtime, procurement of substitute products or services, or for loss of revenue, profits, goodwill, or business or other financial loss. The total liability of Swift arising under or in connection with the purchase of the products, including for any breach of contractual obligations and/or any misrepresentation, misstatement or tortious act or omission (including without limitation, negligence and liability for infringement of any third party intellectual property rights) shall be limited to damages in an amount equal to the amount paid to Swift under the purchase agreement. The exclusion of liability shall apply only to the extent not prohibited by applicable law.

## Notice to Purchaser: Limited License

This product is for research use only and is licensed to the user under Swift Biosciences intellectual property only for the purchaser's internal purposes. Not for use in diagnostic procedures.

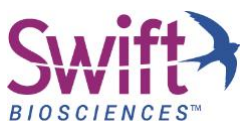

674 S. Wagner Road, Suite 100 • Ann Arbor, MI 48103 • 734.330.2568 • [www.swiftbiosci.com](http://www.swiftbiosci.com)

© 2021, Swift Biosciences, Inc. The Swift logo, Swift Normalase, and Accel-NGS are trademarks of Swift Biosciences. This product is for Research Use Only. Illumina is a registered trademark of Illumina, Inc. AMPure, SPRIPlate, and SPRIselect are registered trademarks of Beckman Coulter, Inc. SureSelect<sup>XT</sup> is a registered trademark of Agilent Technologies. Qubit is registered trademarks of Thermo Fisher Scientific, Inc. Oligonucleotide adapter sequences are copyrighted © 2021 Illumina, Inc. All rights reserved.

PRT-037 Rev1.
